# Supplementary figures and images for: OX40L blockade and allergen-induced airway responses in subjects with mild asthma
Source: PubMed Central journal article supplement — Clin Exp Allergy. 2013 Dec 20;44(1):29–37. doi: 10.1111/cea.12235 (PMC4253735; doi:10.1111/cea.12235), 2013-12-20

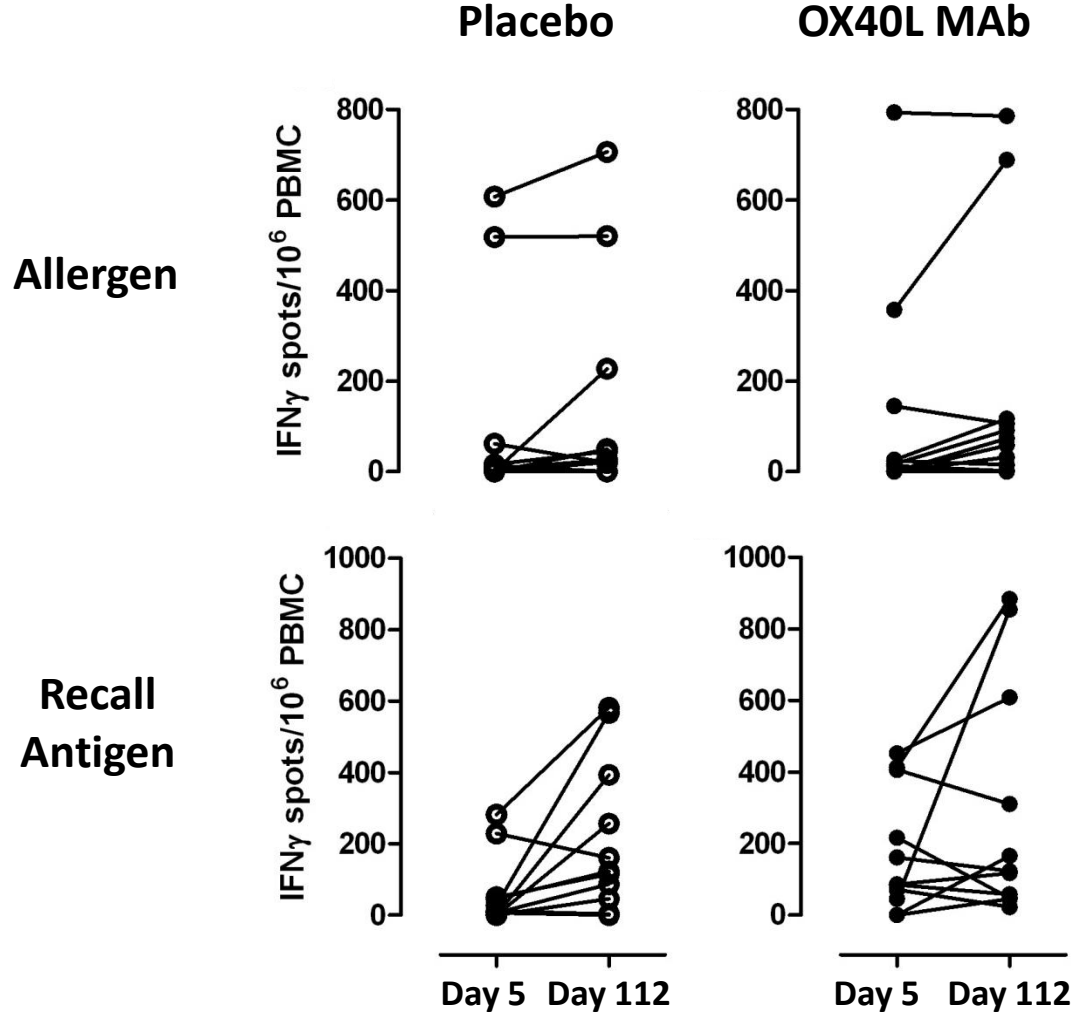

Supplement: cea0044-0029-SD1.pdf [file cea0044-0029-SD1.pdf]
